# Supplementary material for: Girls’ Empowerment and Adolescent Pregnancy: A Systematic Review
Source: MDPI journal article supplement (doi:10.3390/ijerph17051664), 2020-03-04
Supplement: s1 [file s1]

| Study ID     | Experimental             | Comparator | Outcome                | Weight | Randomization process | Deviations from intended interventions | Missing outcome data | Measurement of the outcome | Selection of the reported result | Overall |           |
|--------------|--------------------------|------------|------------------------|--------|-----------------------|----------------------------------------|----------------------|----------------------------|----------------------------------|---------|-----------|
| Rodgers 2010 | Preconception counseling | Usual care | Pyscho-social outcomes | 1      | ?                     | ?                                      | —                    | ?                          | —                                | —       | +         |
|              |                          |            |                        |        |                       |                                        |                      |                            |                                  |         | Low risk  |
|              |                          |            |                        |        |                       |                                        |                      |                            |                                  |         | ?         |
|              |                          |            |                        |        |                       |                                        |                      |                            |                                  |         | —         |
|              |                          |            |                        |        |                       |                                        |                      |                            |                                  |         | High risk |

**Figure S1:** Risk of Bias assessment for randomized control trial done using Cochrane RoB tools ver.2.0 by Sterne, et al., [32].
